# Supplementary material for: Regurgitation and pulmonary aspiration during cardio-pulmonary resuscitation (CPR) with a laryngeal tube: A pilot crossover human cadaver study
Source: PubMed Central journal article supplement (PMC6392290; doi:10.1371/journal.pone.0212704), 2019-02-27
Supplement: pone.0212704.s001.pdf [file pone.0212704.s001.pdf]

| study_id    | 1st treat   | gender | age | bmi | gp1_continuous<br>_pharynx | gp1_continuous<br>_aspiration | gp1_interrupte<br>d_pharynx | gp1_interrupte<br>d_aspiration |
|-------------|-------------|--------|-----|-----|----------------------------|-------------------------------|-----------------------------|--------------------------------|
| 667-01-0000 | Interrupted |        | 0   | 52  | 17.49                      |                               |                             |                                |
| 667-01-0001 | Continuous  |        | 0   | 65  | 38.84                      | 1                             | 0                           | 0                              |
| 667-01-0002 | Interrupted |        | 1   | 55  | 30.3                       |                               |                             |                                |
| 667-01-0003 | Continuous  |        | 0   | 51  | 25.43                      | 1                             | 1                           | 1                              |
| 667-01-0004 | Interrupted |        | 0   | 60  | 24.35                      |                               |                             |                                |
| 667-01-0005 | Continuous  |        | 0   | 78  | 31.7                       | 1                             | 0                           | 1                              |
| 667-01-0006 | Interrupted |        | 0   | 79  |                            |                               |                             |                                |
| 667-01-0007 | Continuous  |        | 0   | 71  | 29.26                      | 1                             | 0                           | 1                              |
| 667-01-0008 | Interrupted |        | 0   | 60  | 21.51                      |                               |                             |                                |
| 667-01-0009 | Continuous  |        | 1   | 71  | 22.63                      | 1                             | 0                           | 1                              |
| 667-01-0010 | Continuous  |        | 0   | 68  | 27.12                      | 1                             | 0                           | 1                              |
| 667-01-0011 | Continuous  |        | 1   | 59  | 26.63                      | 1                             | 1                           | 1                              |
| 667-01-0012 | Interrupted |        | 1   | 73  | 25.38                      |                               |                             |                                |
| 667-01-0013 | Interrupted |        | 0   | 60  | 22.31                      |                               |                             |                                |
| 667-01-0014 | Continuous  |        | 0   | 87  | 20.09                      | 1                             | 0                           | 1                              |
| 667-01-0015 | Continuous  |        | 1   | 87  | 20.94                      | 1                             | 0                           | 1                              |
| 667-01-0016 | Interrupted |        | 1   | 52  | 28.32                      |                               |                             |                                |
| 667-01-0017 | Interrupted |        | 1   | 63  | 34.87                      |                               |                             |                                |

| gp2_interrupte<br>d_pharynx | gp2_interrupte<br>d_aspiration | gp2_continuous<br>_pharynx | gp2_continuous<br>_aspiration |   |
|-----------------------------|--------------------------------|----------------------------|-------------------------------|---|
|                             | 0                              | 0                          | 1                             | 1 |
|                             | 1                              | 0                          | 1                             | 1 |
|                             | 0                              | 0                          | 1                             | 1 |
|                             | 1                              | 0                          | 1                             | 0 |
|                             | 1                              | 0                          | 1                             | 1 |
|                             | 1                              | 0                          | 1                             | 0 |
|                             | 1                              | 1                          | 1                             | 1 |
|                             | 1                              | 1                          | 1                             | 1 |
|                             | 1                              | 1                          | 1                             | 1 |
|                             | 1                              | 0                          | 1                             | 1 |
